# Supplementary material for: Early diagnosis of sepsis in emergency departments, time to treatment, and association with mortality: An observational study
Source: PubMed Central journal article supplement (PMC6975530; doi:10.1371/journal.pone.0227652), 2020-01-22
Supplement: pone.0227652.s003.pdf [file pone.0227652.s003.pdf]

### Sub-analyses – patients with organ failure

We replicated the analyses of association between diagnostic procedures and time to treatment and between time to treatment and mortality on the sub-group of patients with organ dysfunction (Table S3.1 and Fig S3.1, below).

**Table S3.1. Linear regression for factors associated with delay in antibiotic treatment. Patients with organ failure.**

|                                                          | <b>Unadjusted</b><br><i>b (95% CI)</i> | <b>Model 1*</b><br><i>b (95% CI)</i> | <b>Model 2†</b><br><i>b (95% CI)</i> |
|----------------------------------------------------------|----------------------------------------|--------------------------------------|--------------------------------------|
| Not triaged within 15 minutes                            | 53.5 (21.4 to 85.7)                    | 56.1 (26.2 to 86.0)                  | 17.1 (-11.1 to 45.3)                 |
| Examination by physician not in accordance with priority | 64.2 (34.8 to 93.5)                    | 67.4 (39.1 to 95.7)                  | 47.2 (18.5 to 75.9)                  |
| Lactate not measured within 1 hour                       | 78.5 (56.9 to 100.2)                   | 84.3 (65.2 to 103.3)                 | 25.3 (8.6 to 42.0)                   |
| Inadequate observation regimen                           | 42.8 (21.4 to 64.2)                    | 42.3 (22.0 to 62.6)                  | 69.1 (48.6 to 89.5)                  |

Outcome variable: Time to antibiotics measured in minutes. n=487

\* Adjusted for patient age, comorbidity, and time to admission

† Adjusted for the other variables in this table, and age, comorbidity, and time to admission

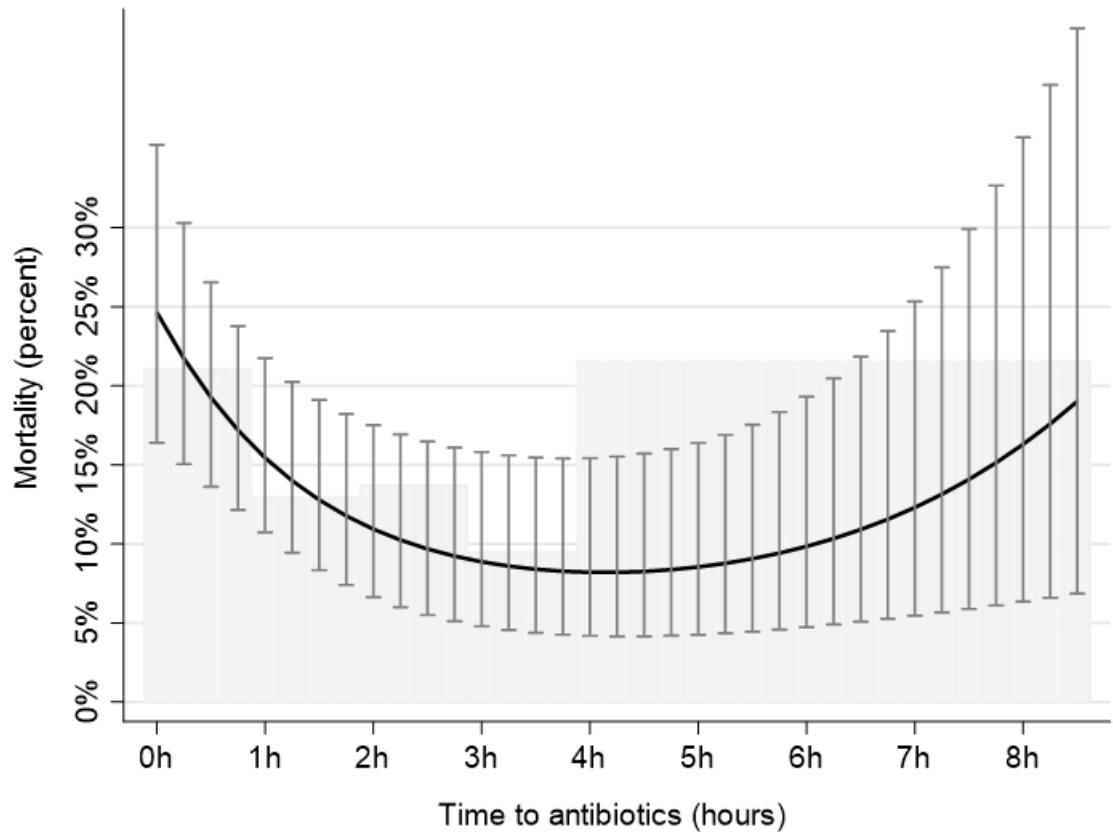

**Fig S3.1. All-cause 30-day mortality by time to antibiotic treatment. Patients with organ failure.**

Gray shaded histogram represents mortality rates according to time to antibiotic treatment in hours. Solid black curve with bars represents model-predicted mortality rates with 95% confidence intervals according to time to antibiotic treatment in minutes using logistic regression models, adjusted for patient’s age, date of admission, comorbidity, and presence of organ failure. Date of admission was measured using calendar days since study start, entered as a polynomial function with first ( $b -0.0113$   $p < .01$ ), second ( $b 2.8e-5$   $p < .05$ ) and third degree ( $b -1.37e-8$   $p < 0.1$ ) variables. The model prediction uses average values for adjustment values. N=488.
